# Supplementary material for: Eu2+ ions as an antioxidant additive for Sn-based perovskite light-emitting diodes
Source: Royal Society of Chemistry journal article supplement (doi:10.1039/d1tc03658k), 2021-01-01
Supplement: d1tc03658k1.pdf [file d1tc03658k1.pdf]

## **Supplementary information**

### **Eu<sup>2+</sup> ions as an antioxidant additive for Sn-based perovskite light-emitting diodes**

Xi Wang,<sup>a, b, #</sup> Lihua Liu,<sup>c, #</sup> Zhao Qian,<sup>d, #</sup> Congcong Gao,<sup>a</sup> Hongyan Liang<sup>a, b, \*</sup>

<sup>a</sup> School of Materials Science and Engineering, Tianjin University, Tianjin 300350, P. R. China

<sup>b</sup> Key Laboratory of Efficient Utilization of Low and Medium Grade Energy, Ministry of Education, Tianjin University, Tianjin 300350, P. R. China

<sup>c</sup> College of Innovation and Entrepreneurship, Shanghai Jianqiao University, Shanghai 201306, P. R. China

<sup>d</sup> Key Laboratory of Liquid-Solid Structural Evolution and Processing of Materials (Ministry of Education), Shandong University, Jinan 250061, P. R. China

### **Corresponding Author**

\* E-mail: hongyan.liang@tju.edu.cn

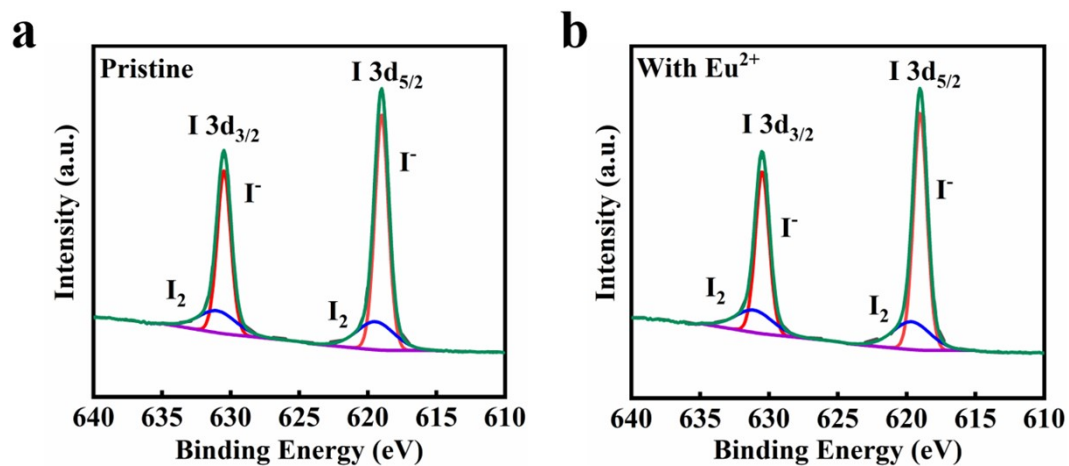

**Figure S1.** High-resolution XPS I 3d spectra of perovskite films (a) without and (b) with  $\text{Eu}^{2+}$  ions.

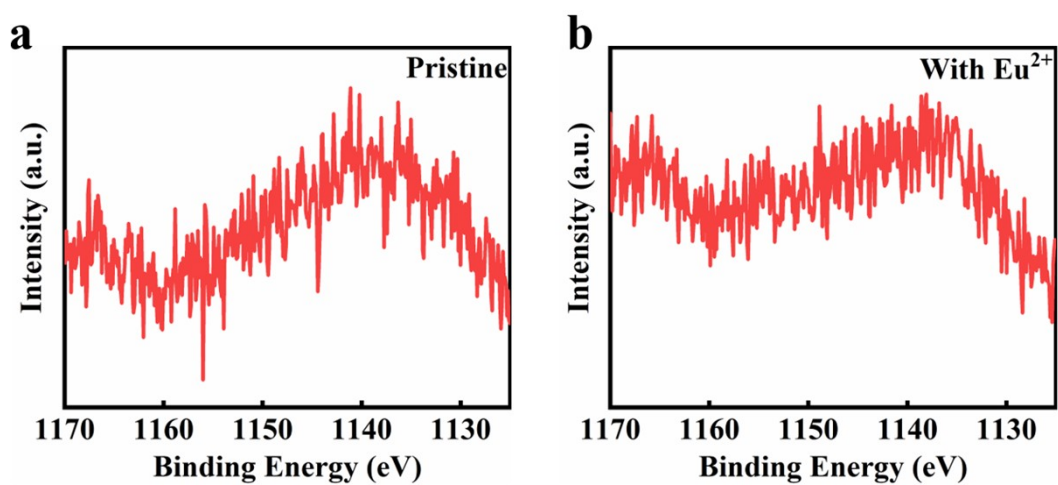

**Figure S2.** High-resolution XPS Eu 3d spectra of perovskite films (a) without and (b) with  $\text{Eu}^{2+}$  ions.

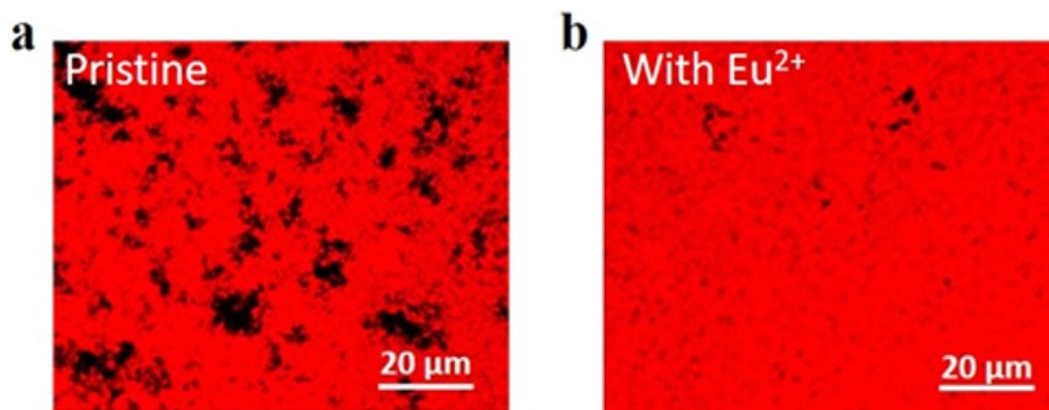

**Figure S3.** Photoluminescent images of perovskite film (a) without and (b) with  $\text{Eu}^{2+}$  ions under confocal microscope.

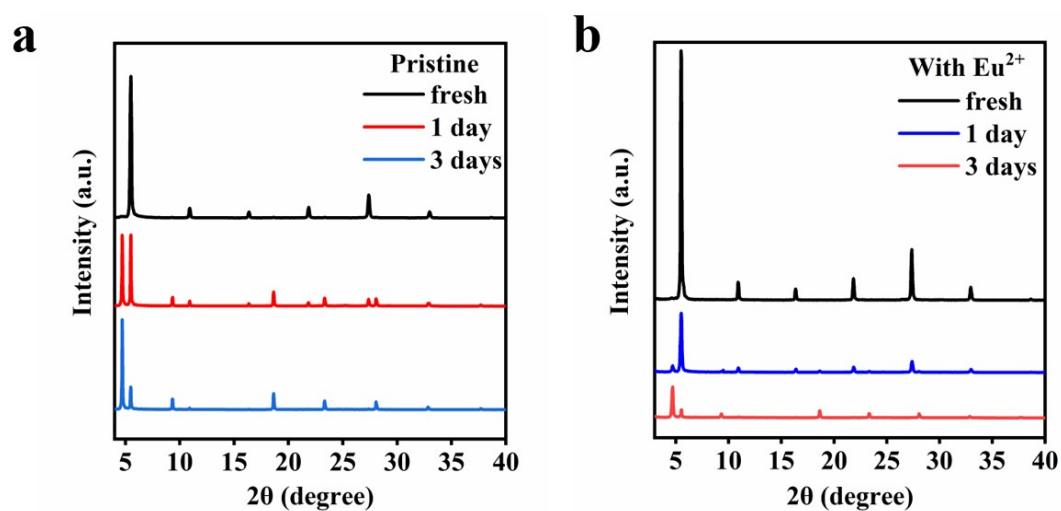

**Figure S4.** XRD patterns of perovskite films (a) without and (b) with  $\text{Eu}^{2+}$  ions at different air-exposure times.

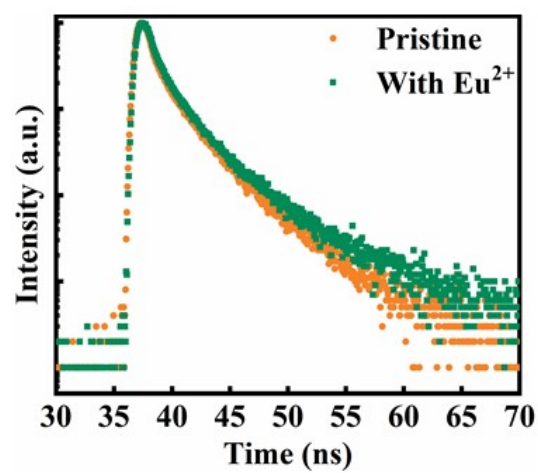

**Figure S5.** TRPL spectra of perovskite films without (orange) and with (green) Eu<sup>2+</sup> ions.

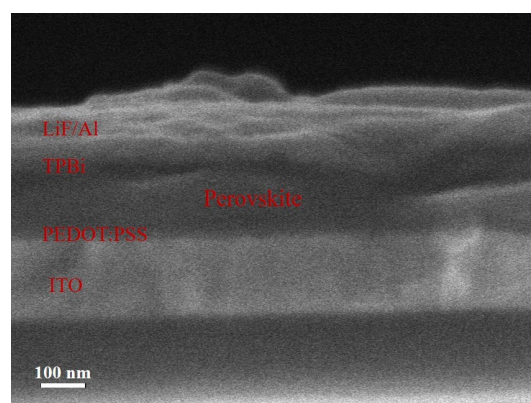

**Figure S6.** Cross-sectional SEM image of the tin-based LEDs.

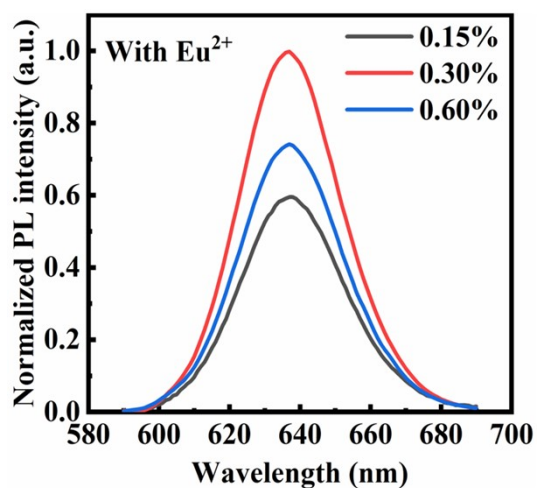

**Figure S7.** Steady-state PL spectra of perovskite film with different concentration of  $\text{Eu}^{2+}$  ions.

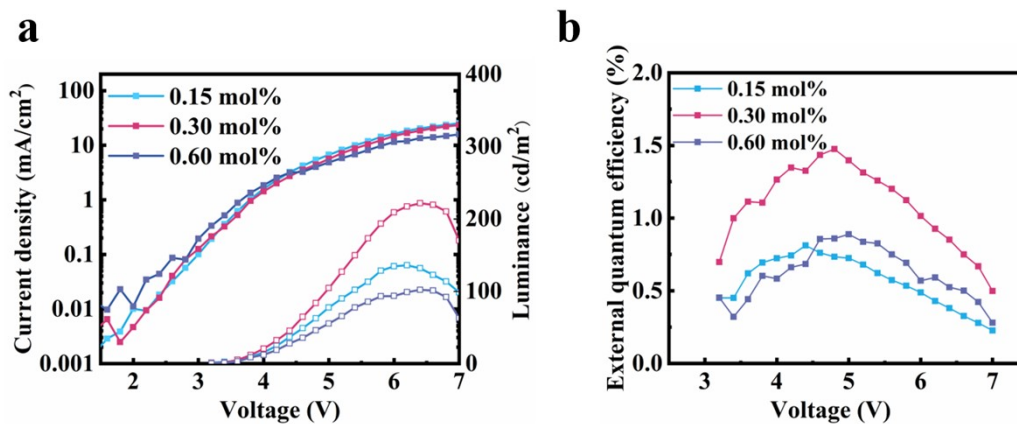

**Figure S8.** I-V and L-V curves (a) and EQE characteristics (b) of LEDs with different concentration of  $\text{Eu}^{2+}$  ions.

**Table S1.** TA decay parameters of perovskite films without and with Eu<sup>2+</sup> ions.

| Sample                | $\tau_1$ (ps) | A <sub>1</sub> % | $\tau_2$ (ps) | A <sub>2</sub> % | $\tau_{ave}$ (ps) |
|-----------------------|---------------|------------------|---------------|------------------|-------------------|
| Pristine              | 61.4245       | 50.06            | 420.6911      | 30.573           | 351.37            |
| With Eu <sup>2+</sup> | 68.2022       | 44.106           | 575.3293      | 32.88            | 505.75            |

**Table S2.** TRPL decay parameters of perovskite films without and with Eu<sup>2+</sup>.

| Sample                | $\tau_1$ (ns) | A <sub>1</sub> % | $\tau_2$ (ns) | A <sub>2</sub> % | $\tau_3$ (ns) | A <sub>3</sub> % | $\tau_{ave}$ (ns) | $\chi^2$ |
|-----------------------|---------------|------------------|---------------|------------------|---------------|------------------|-------------------|----------|
| Pristine              | 1.50368       | 37.88            | 0.12864       | 41.24            | 4.00589       | 20.88            | 2.89              | 1.00595  |
| With Eu <sup>2+</sup> | 1.67516       | 47.41            | 5.29          | 16.55            | 0.1565        | 36.04            | 3.48              | 1.04461  |
